# Supplementary material for: Comparison of busulfan and total body irradiation conditioning on hematopoietic clonal dynamics following lentiviral gene transfer in rhesus macaques
Source: PubMed Central journal article supplement — Mol Ther Methods Clin Dev. 2022 Dec 6;28:62–75. doi: 10.1016/j.omtm.2022.12.001 (PMC9798201; doi:10.1016/j.omtm.2022.12.001), 2022-12-06
Supplement: mmc1.pdf [file mmc1.pdf]

**Supplemental information**

**Comparison of busulfan and total body irradiation  
conditioning on hematopoietic clonal dynamics  
following lentiviral gene transfer in rhesus macaques**

**Diana M. Abraham, Richard J. Lozano, Xavi Guitart, Jialiu A. Liang, Ryland D. Mortlock, Diego A. Espinoza, Xing Fan, Allen Krouse, Aylin Bonifacino, So Gun Hong, Komudi Singh, John F. Tisdale, Chuanfeng Wu, and Cynthia E. Dunbar**

**Table S1: TBI animal transplantation and engraftment parameters**

|                                                        | <b>TBI Animal ID</b>               |                                  |                                 |                                  |                                  |
|--------------------------------------------------------|------------------------------------|----------------------------------|---------------------------------|----------------------------------|----------------------------------|
|                                                        | ZH33                               | ZG66                             | ZJ31                            | ZH19                             | ZK22                             |
| <b>Vector</b>                                          | pCDH-MSCV-T2A- copGFP library11    | pCDH-MSCV-T2A- copGFP library 11 | pCDH-MSCV-T2A- copGFP library11 | pCDH-EF1α-T2A- copGFP library 11 | pCDH-MSCV-T2A- copGFP library 19 |
| <b>Transduction MOI</b>                                | 25                                 | 25                               | 25                              | 25                               | 25                               |
| <b>Transduction condition</b>                          | FN+ Cytokines + protamine sulfate* |                                  |                                 |                                  |                                  |
| <b>Transduction efficiency</b>                         | 35%                                | 35%                              | 35%                             | 23%                              | 31%                              |
| <b>Number of cells infused(millions)</b>               | 32                                 | 48                               | 23                              | 48                               | 82                               |
| <b>Transplantation dose (CD34+ cells millions /kg)</b> | 6.9                                | 8.5                              | 4.1                             | 7.1                              | 7.2                              |
| <b>Infused GFP+ cells(millions)</b>                    | 11.1                               | 16.7                             | 8                               | 11                               | 25.2                             |

\*Fibronectin (FN) coated plate+ % HSA + cytokines (Flt-3, SCF, TPO all at 100ng/mL) + protamine sulfate(4µg/ml)

**Table S2: List of antibodies used for flow cytometric analysis and FACS**

| <b>Antigen</b> | <b>Conjugation</b> | <b>Vendor</b>      | <b>Catalog number</b> | <b>Clone</b> |
|----------------|--------------------|--------------------|-----------------------|--------------|
| CD3            | BV786              | BD Pharmingen      | 557757                | SP34-2       |
| CD20           | APC-Cy7            | BD Pharmingen      | 335794                | L27          |
| CD14           | Pacific Blue       | Invitrogen         | MHCD1428              | TuK4         |
| CD16           | APC                | BioLegend          | 302012                | 3G8          |
| CD56           | PE-Cy5             | BD Pharmingen      | 555517                | B159         |
| NKG2A          | PE-Cy7             | Beckman<br>Coulter | IM3291U               | Z199         |
| CD271          | PE                 | BD Pharmingen      | 557196                | C40-1457     |

**Table S3: List of primers used for barcode retrieval via PCR and sequencing**

**Table S4: Busulfan pharmacokinetic data**

| <b>Animal ID</b> | <b>Dose (mg/kg)</b> | <b>C max (ug/mL)</b> | <b>AUC (uM*min)</b> | <b>t 1/2 (h)</b> | <b>Drug Clearance(mL/min/kg)</b> |
|------------------|---------------------|----------------------|---------------------|------------------|----------------------------------|
| 11021142         | 5.5                 | 4.433                | 3675                | 1.60             | 6.08                             |
| H84D             | 6.0                 | 5.422                | 3791                | 1.39             | 6.43                             |

Maximum concentration (C max), the total area under the curve (AUC), drug half-life (t 1/2), and drug clearance

# Figure S1

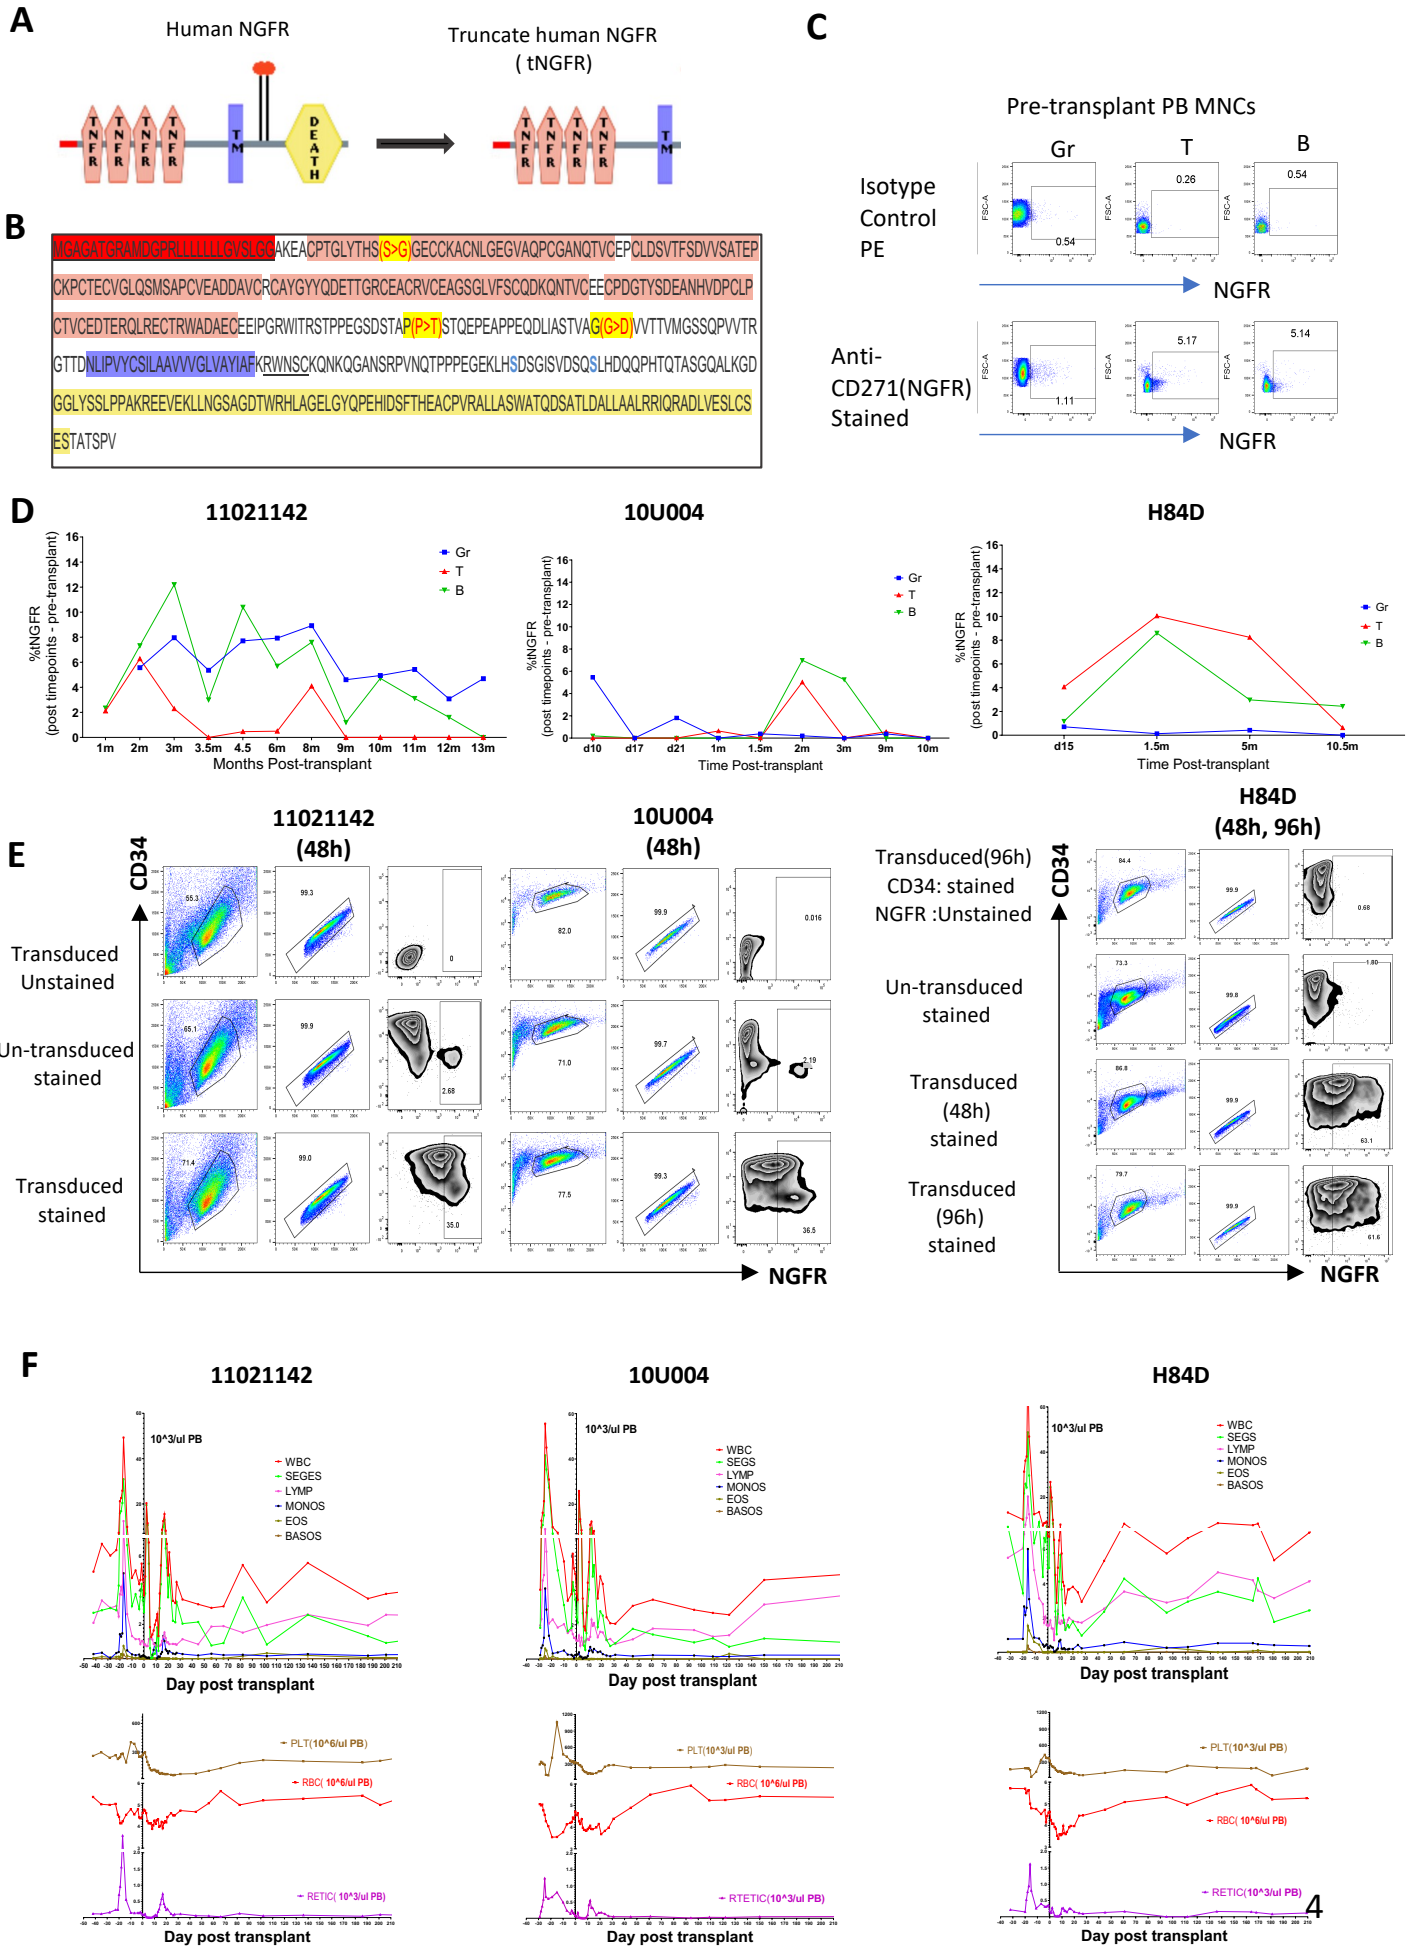

## Figure S1:

(A): The schema of the truncate human NGFR (tNGFR) used in the lentivector as surface marker gene.

(B): The protein sequence of the human tNGFR, 3 amino acids were different between human and rhesus macaque(human>rhesus)

(C): NGFR expression on the pre-transplanted animal.

(D): NGFR expression follow up on lineage cells post transplantation. The % of the NGFR showing on the Y-axis is the % of NGFR from the flow analysis from the post-transplant samples minus the % of NGFR from the flow analysis from the pre-transplant samples.

(E): NGFR expression on CD34+ HSPCs post in vitro barcode-tNGFR lentivirus transduction at 48h- 96h.

(F): Complete blood counts of 3 busulfan monkeys overtime. Day 0 is the day of transplantation. Top row: WBC, white blood cells, red curve; SEGS, segmented neutrophils, neutrophils, granulocytes, green curve; LYMP, lymphocytes, magenta curve; MONOS, monocytes, blue curve; EOS, eosinophils, light brown curve; BASOS, basophils, brown curve; Bottom row: PLT, platelets, brown curve; RBC, red blood cells, red curve; RETIC, reticulocytes, magenta curve.

**Figure S2**

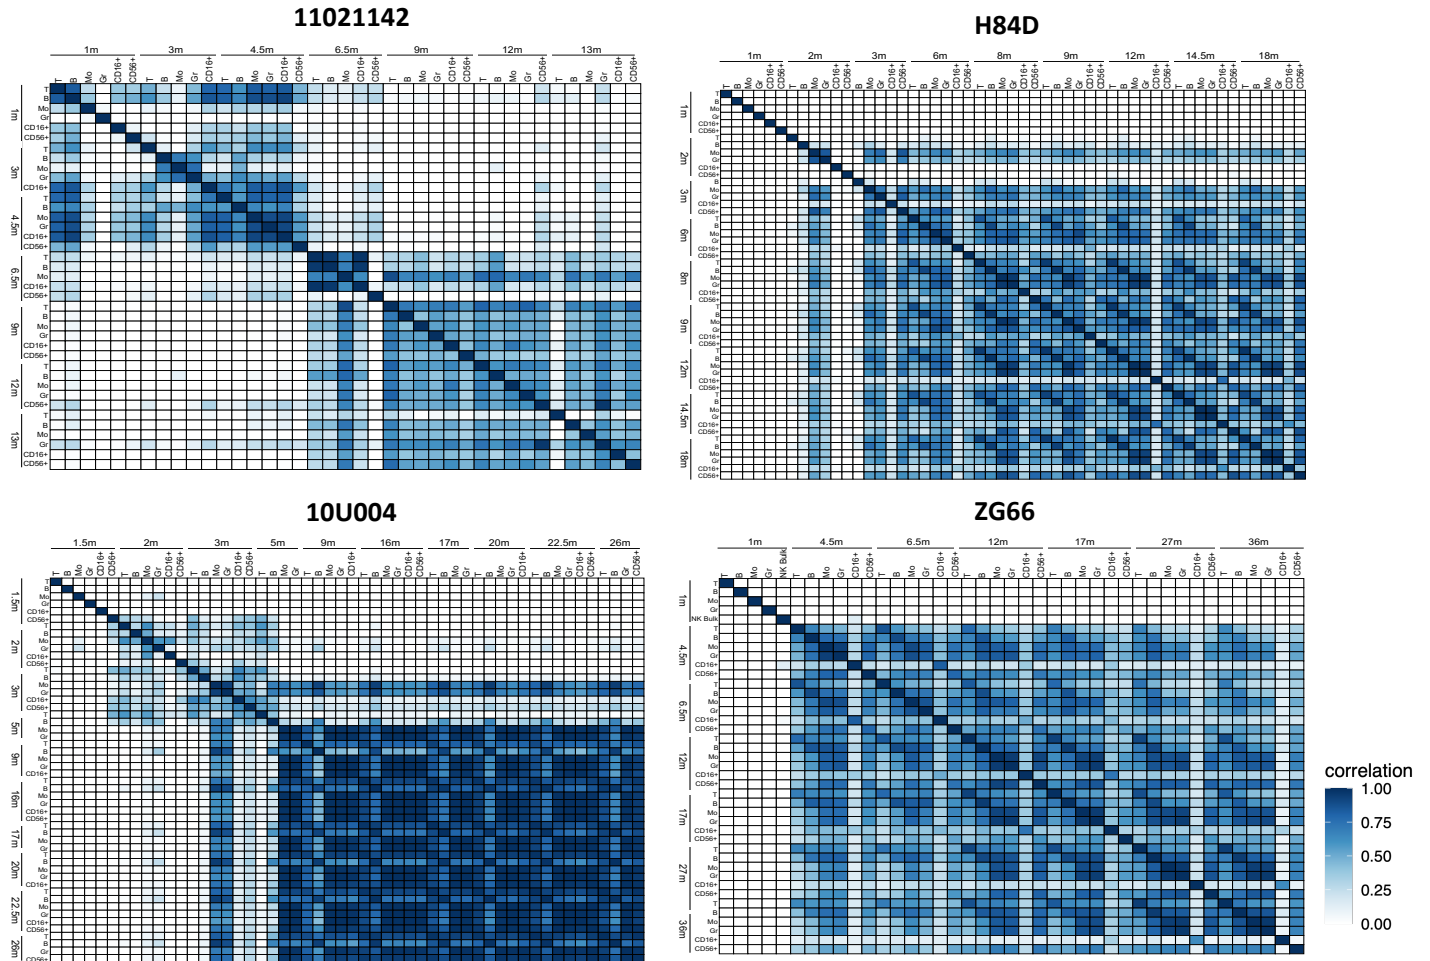

**Figure S2: Clonal contributions correlation between PB lineages.**

Pearson correlation coefficients plots comparing pairwise fractional contributions between PB lineages (T, B, Mo, Gr, CD16+ NK, and CD56+ NK) over time for 11021042, 10U004, H84D, and ZG66. The color scale for correlation values is shown on the right.

# Figure S3

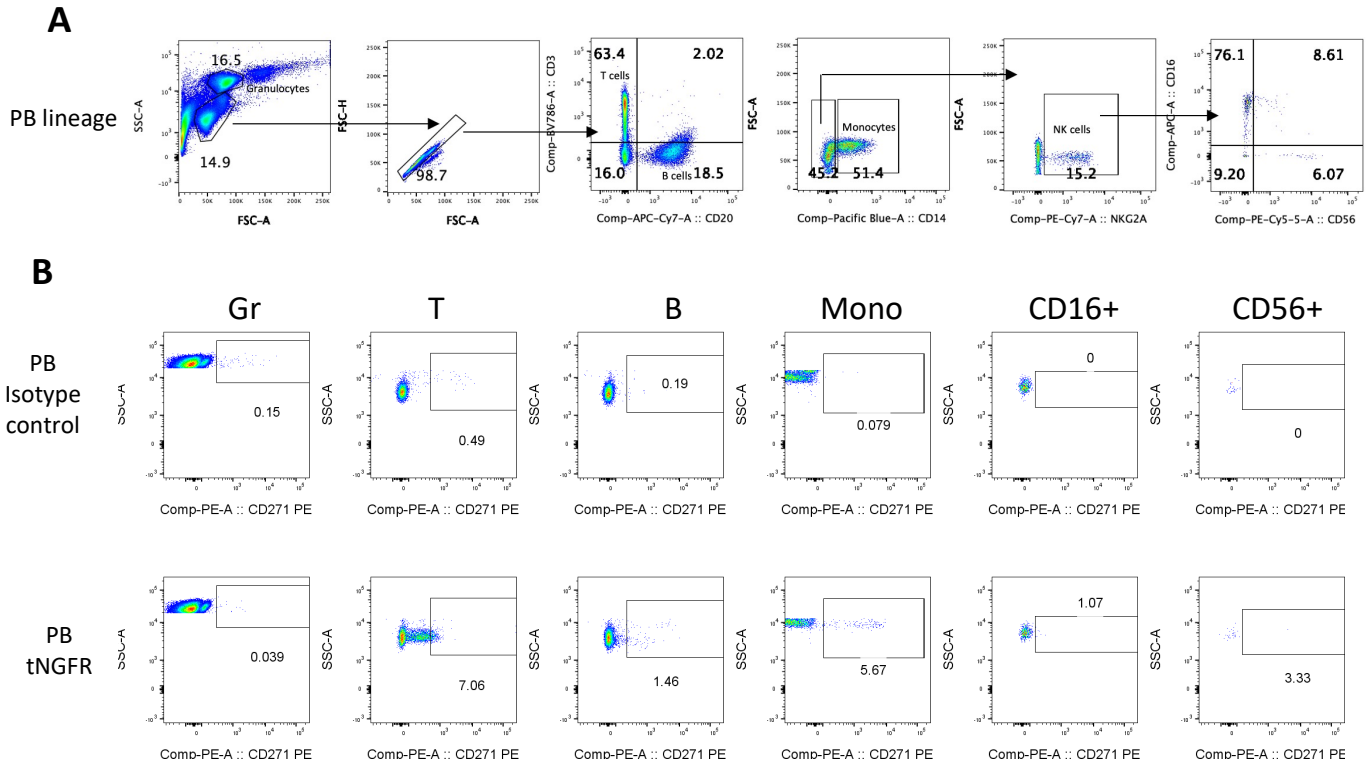

**Figure S3: Flow cytometric gating strategy in peripheral blood lineages.**

(A): Example gating strategy of PB lineages (Gr, T, B, Mono, CD16+NK, and CD56+NK).

(B): CD271+ detection with an isotype control sample of H84D at 2m after transplantation.



**Figure S4**

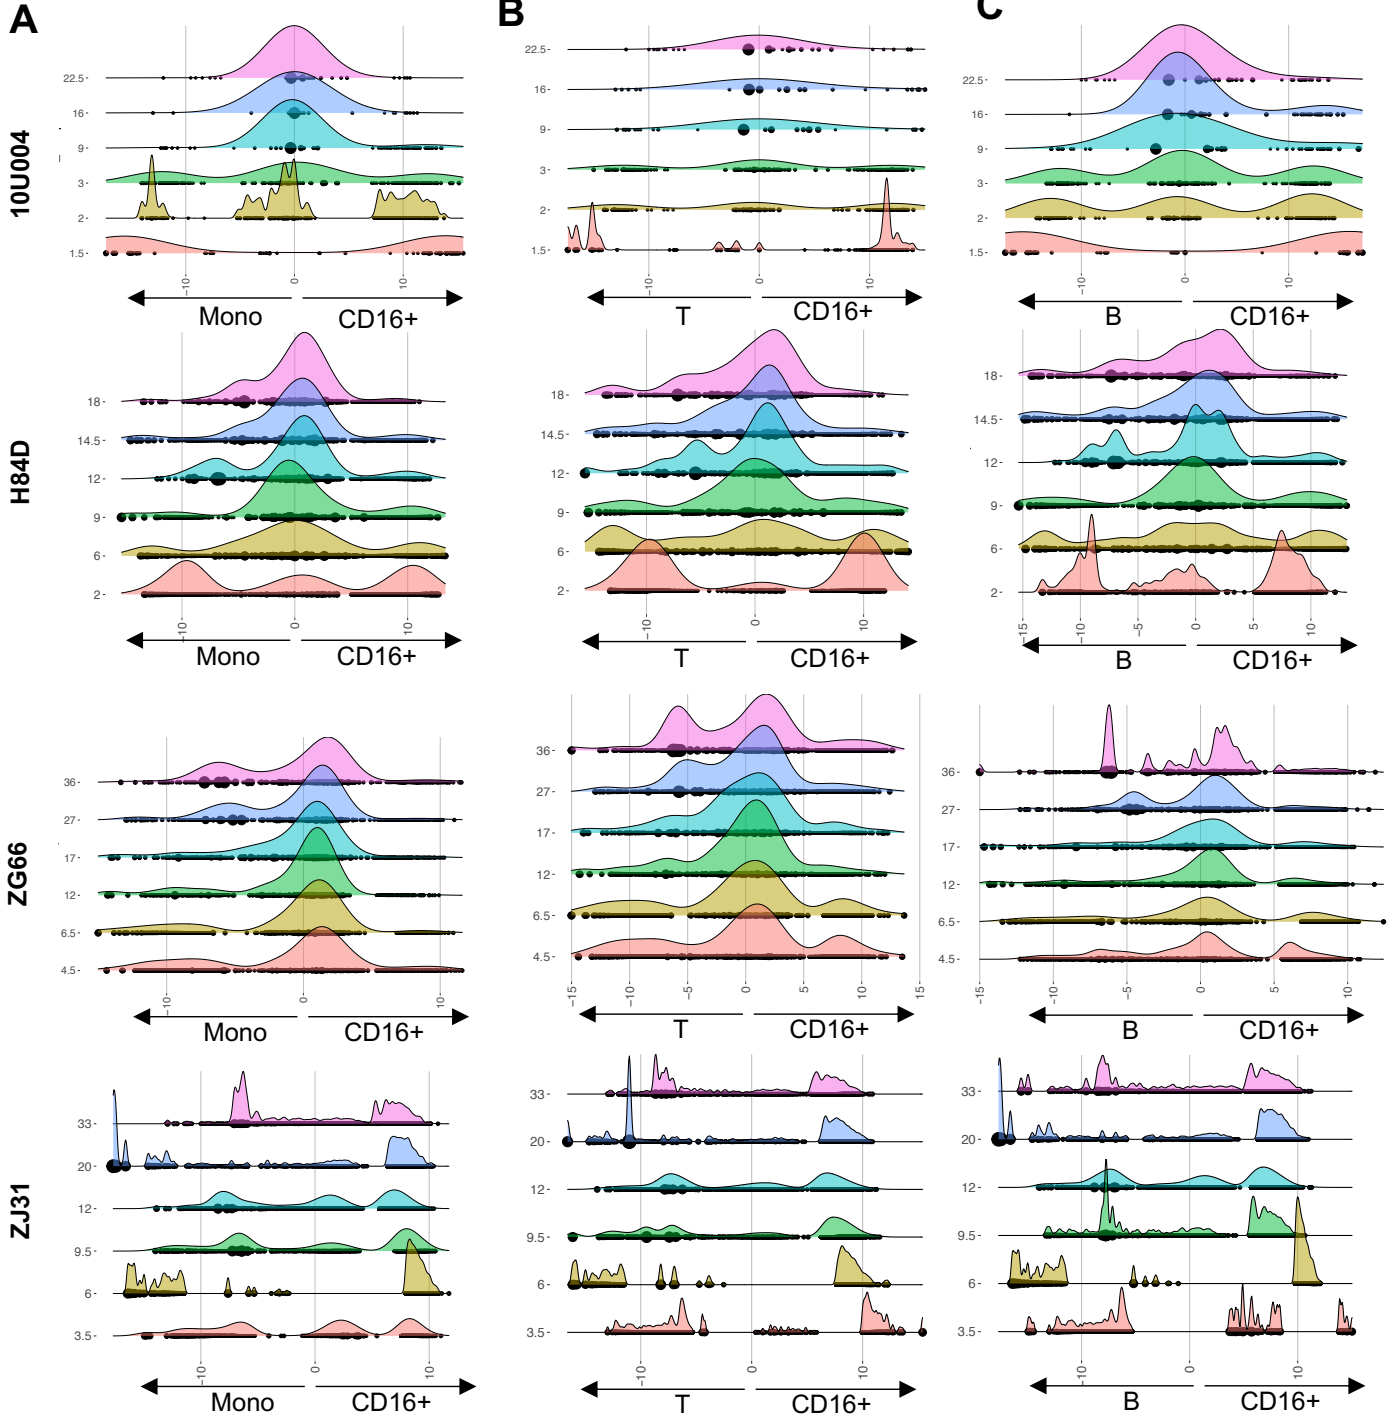

**Figure S4: Clonal bias in CD16+ CD56- NK cells versus PB lineages**

Ridge plot showing clonal bias between CD16+ NK and (A) Mono, (B) T cells, and (C) B cells over time for busulfan treated animals, 10U004 and H84D, and TBI treated animal, ZG66.
